# Supplementary material for: Comparison of influenza and COVID-19 hospitalizations in British Columbia, Canada: a population-based study
Source: bioRxiv or medRxiv preprint supplement (doi:10.1101/2022.08.26.22279284), 2022-08-30
Supplement: Supplementary file [file media-1.pdf]

Table S1. Data Sources integrated within the British Columbia COVID-19 Cohort (BCC19C)

| <b>British Columbia Centre for Disease Control (BCCDC), Provincial Health Services Authority (PHSA) and Regional Health Authority data sources:</b>                                                                                                                                                                                                | <b>Data Date Ranges:</b> |
|----------------------------------------------------------------------------------------------------------------------------------------------------------------------------------------------------------------------------------------------------------------------------------------------------------------------------------------------------|--------------------------|
| - Integrated COVID-19 laboratory dataset (SARS-CoV2 tests from private/public labs) <sup>S1</sup>                                                                                                                                                                                                                                                  | Jan,2020-onward          |
| - COVID-19 surveillance case data (information collected on all probable/confirmed cases as part of public health follow up by the regional health authorities in BC, including hospitalization data) <sup>S2</sup>                                                                                                                                | Jan,2020-onward          |
| - Provincial COVID-19 Monitoring Solution (critical and non-critical care hospital census data, the PCMS is a daily hospital census of COVID-19 patients admitted to acute care facilities across BC and captures all hospitalizations following a positive COVID-19 test regardless of whether the hospitalization is for COVID-19) <sup>S3</sup> | Jan,2020-onward          |
| - Provincial Immunizations Registry (COVID-19 vaccination data) <sup>S4</sup>                                                                                                                                                                                                                                                                      | Dec,2020-onward          |
| - Provincial Laboratory Information Solution (laboratory tests from private/public labs) <sup>S5</sup>                                                                                                                                                                                                                                             | Jan,2020-onward          |
| - Public Health Reporting Data warehouse (Influenza laboratory tests) <sup>S6</sup>                                                                                                                                                                                                                                                                | Jan,2008-onward          |
| <b>Ministry of Health (MoH) Administrative Data Sources:</b>                                                                                                                                                                                                                                                                                       |                          |
| - Discharge Abstracts Database (DAD) (hospital discharge records) <sup>S7</sup>                                                                                                                                                                                                                                                                    | 2008/9-onward            |

**Supplementary References:**

- S1. British Columbia Centre for Disease Control [creator]. Integrated COVID-19 laboratory dataset (SARS-CoV2 tests from private/public labs). Public Health Reporting Data Warehouse, British Columbia Centre for Disease Control [publisher] (2020). 2021.
- S2. British Columbia Centre for Disease Control [creator]. COVID-19 surveillance case data. British Columbia Centre for Disease Control [publisher]. (2020). 2021.
- S3. Provincial Health Services Authority [creator]. Provincial COVID-19 Monitoring Solution. Provincial Health Services Authority [publisher]. (2020). 2021.
- S4. Provincial Health Services Authority [creator]. COVID-19 vaccination data. Provincial Immunizations Registry, Provincial Public Health Information Systems [publisher]. (2020). 2021.
- S5. Provincial Health Services Authority [creator]. Provincial Public Health Information Systems [publisher]. (2020). 2021.
- S6. British Columbia Centre for Disease Control [creator]. Respiratory datamart, Public Health Reporting Data Warehouse, British Columbia Centre for Disease Control [publisher] (2020). 2021.
- S7. British Columbia Ministry of Health [creator]. Discharge Abstract Database (Hospital Separations). British Columbia Ministry of Health [publisher]. Data Extract. MOH (2020). 2021. (<https://www2.gov.bc.ca/gov/content/health/health-forms/online-services>)

Table S2. Variables of interest of the study

| Variables                     | Definition/Categories                                                                                                                                                                                                                                                                                                                                                                                                                                                                                                                                                                                                                                                                                                                                                                                                                                                                                                                                                    |
|-------------------------------|--------------------------------------------------------------------------------------------------------------------------------------------------------------------------------------------------------------------------------------------------------------------------------------------------------------------------------------------------------------------------------------------------------------------------------------------------------------------------------------------------------------------------------------------------------------------------------------------------------------------------------------------------------------------------------------------------------------------------------------------------------------------------------------------------------------------------------------------------------------------------------------------------------------------------------------------------------------------------|
| Age                           | Age (years) was categorized into 0-4, 5-11, 12-17, 18-29, 30-39, 40-49, 50-59, 60-69, and 70+ years old                                                                                                                                                                                                                                                                                                                                                                                                                                                                                                                                                                                                                                                                                                                                                                                                                                                                  |
| Sex                           | Sex was categorized into Male, Female, Unknown                                                                                                                                                                                                                                                                                                                                                                                                                                                                                                                                                                                                                                                                                                                                                                                                                                                                                                                           |
| Health authority of residence | British Columbia has five regional health authorities that deliver health services to meet the needs of the population within their respective geographic regions: Fraser, Vancouver Coastal, Vancouver Island, Interior, and Northern. Missing health authority was categorized as “Unknown”.                                                                                                                                                                                                                                                                                                                                                                                                                                                                                                                                                                                                                                                                           |
| Admission date                | Date of hospital admission                                                                                                                                                                                                                                                                                                                                                                                                                                                                                                                                                                                                                                                                                                                                                                                                                                                                                                                                               |
| Discharge date                | Date of hospital discharge                                                                                                                                                                                                                                                                                                                                                                                                                                                                                                                                                                                                                                                                                                                                                                                                                                                                                                                                               |
| Length of stay in hospital    | Length of stay in the hospital was generated by subtracting discharge date from admission date within one episode of hospitalization                                                                                                                                                                                                                                                                                                                                                                                                                                                                                                                                                                                                                                                                                                                                                                                                                                     |
| Vaccine status                | Vaccine status was categorized into Fully vaccinated, Vaccinated with 1 dose (or partially vaccinated) and Unvaccinated. Fully vaccination was defined as receipt of two or more doses in which the second/third dose was received $\geq 14$ days before case surveillance date. Case surveillance date is based on date of symptom onset. When symptom onset was unavailable, earliest laboratory date was used (collection or result date); if also unavailable, then public health report date was used. Partially vaccinated cases were those who became a case $\geq 21$ days after their first dose and did not meet the criteria of fully vaccinated. Unvaccinated cases were those without any doses or those cases within $< 21$ days after their first dose. Partially vaccinated cases were only included for the children 5-11 years old and excluded from 12+ cases due to small sample size. Children aged 0-4 were not eligible for COVID-19 vaccination. |

*Table S3: Demographic characteristics of hospitalized patients testing positive for COVID-19 during a year in 2020/21 and for influenza in 2009/10 (H1N1 pandemic), 2015/16 (severe for children), and 2016/17 (severe for adults)*

| <b>Characteristics</b>                                                                                                                                                                                                                                                                                                                                                                                                               | <b>COVID-19<br/>(n=3,398)</b> | <b>Influenza 2009/10<br/>(n=1,483)</b> | <b>Influenza 2015/16<br/>(n=1,032)</b> | <b>Influenza 2016/17<br/>(n=1,979)</b> |
|--------------------------------------------------------------------------------------------------------------------------------------------------------------------------------------------------------------------------------------------------------------------------------------------------------------------------------------------------------------------------------------------------------------------------------------|-------------------------------|----------------------------------------|----------------------------------------|----------------------------------------|
|                                                                                                                                                                                                                                                                                                                                                                                                                                      | n (%)                         | n (%)                                  | n (%)                                  | n (%)                                  |
| <b>Sex</b>                                                                                                                                                                                                                                                                                                                                                                                                                           |                               |                                        |                                        |                                        |
| Female                                                                                                                                                                                                                                                                                                                                                                                                                               | 1462 (43)                     | 788 (53)                               | 519 (50)                               | 1037 (52)                              |
| Male                                                                                                                                                                                                                                                                                                                                                                                                                                 | 1932 (57)                     | 695 (47)                               | 513 (50)                               | 941 (48)                               |
| Unknown                                                                                                                                                                                                                                                                                                                                                                                                                              | <5                            | 0 (0)                                  | 0 (0)                                  | <5                                     |
| <b>Age, years</b>                                                                                                                                                                                                                                                                                                                                                                                                                    |                               |                                        |                                        |                                        |
| Median (Q1-Q3)                                                                                                                                                                                                                                                                                                                                                                                                                       | 66 (52-78)                    | 40 (16-55)                             | 59 (33-75)                             | 77 (61-86)                             |
| <b>Age category, years</b>                                                                                                                                                                                                                                                                                                                                                                                                           |                               |                                        |                                        |                                        |
| 0-4                                                                                                                                                                                                                                                                                                                                                                                                                                  | 21 (1)                        | 196 (13)                               | 108 (10)                               | 67 (3)                                 |
| 5-11                                                                                                                                                                                                                                                                                                                                                                                                                                 | 5 (0)                         | 130 (9)                                | 53 (5)                                 | 29 (1)                                 |
| 12-17                                                                                                                                                                                                                                                                                                                                                                                                                                | 6 (0)                         | 68 (5)                                 | 27 (3)                                 | 23 (1)                                 |
| 18-29                                                                                                                                                                                                                                                                                                                                                                                                                                | 135 (4)                       | 195 (13)                               | 44 (4)                                 | 39 (2)                                 |
| 30-39                                                                                                                                                                                                                                                                                                                                                                                                                                | 278 (8)                       | 143 (10)                               | 74 (7)                                 | 69 (3)                                 |
| 40-49                                                                                                                                                                                                                                                                                                                                                                                                                                | 323 (10)                      | 217 (15)                               | 78 (8)                                 | 73 (4)                                 |
| 50-59                                                                                                                                                                                                                                                                                                                                                                                                                                | 497 (15)                      | 243 (16)                               | 137 (13)                               | 168 (8)                                |
| 60-69                                                                                                                                                                                                                                                                                                                                                                                                                                | 677 (20)                      | 123 (8)                                | 156 (15)                               | 258 (13)                               |
| 70+                                                                                                                                                                                                                                                                                                                                                                                                                                  | 1456 (43)                     | 168 (11)                               | 355 (34)                               | 1253 (63)                              |
| <b>Health authority</b>                                                                                                                                                                                                                                                                                                                                                                                                              |                               |                                        |                                        |                                        |
| Fraser                                                                                                                                                                                                                                                                                                                                                                                                                               | 1650 (49)                     | 460 (31)                               | 264 (26)                               | 439 (22)                               |
| Vancouver Coastal                                                                                                                                                                                                                                                                                                                                                                                                                    | 899 (26)                      | 279 (19)                               | 322 (31)                               | 636 (32)                               |
| Vancouver Island                                                                                                                                                                                                                                                                                                                                                                                                                     | 130 (4)                       | 228 (15)                               | 229 (22)                               | 601 (30)                               |
| Interior                                                                                                                                                                                                                                                                                                                                                                                                                             | 322 (9)                       | 351 (24)                               | 139 (13)                               | 224 (11)                               |
| Northern                                                                                                                                                                                                                                                                                                                                                                                                                             | 397 (12)                      | 151 (10)                               | 62 (6)                                 | 59 (3)                                 |
| Unknown                                                                                                                                                                                                                                                                                                                                                                                                                              | 0 (0)                         | 14 (1)                                 | 16 (2)                                 | 20 (1)                                 |
| Abbreviation: COVID-19=Coronavirus Disease 2019, n=number, Q=Quartile                                                                                                                                                                                                                                                                                                                                                                |                               |                                        |                                        |                                        |
| Note: For the annual COVID-19 cohort we included all patients hospitalized for COVID-19 up to 14 days after or 2 days prior to specimen collection date from March 2020 to February 2021. For influenza, we selected three 12-month periods from September to August with distinct severity: 2009/10=H1N1 pandemic, 2015/16=mild influenza with higher severity in children, 2016/17=severe influenza with higher severity in adults |                               |                                        |                                        |                                        |

*Table S4: Median of length of stay (days) in hospital among patients testing positive for COVID-19 during a year in 2020/21 and patients hospitalized for influenza in 2009/10 (H1N1 pandemic), 2015/16 (severe for children), and 2016/17 (severe for adults) in British Columbia, Canada*

| <b>Age group, years</b>                                                                                                                                                                                                                                                                                                                                                                                                              | <b>COVID_19<br/>(n=3398)</b> | <b>Influenza 2009/10<br/>(n=1483)</b> | <b>Influenza 2015/16<br/>(n=1032)</b> | <b>Influenza 2016/17<br/>(n=1979)</b> | <b>P-<br/>value<sup>#</sup></b> |
|--------------------------------------------------------------------------------------------------------------------------------------------------------------------------------------------------------------------------------------------------------------------------------------------------------------------------------------------------------------------------------------------------------------------------------------|------------------------------|---------------------------------------|---------------------------------------|---------------------------------------|---------------------------------|
| <b>Total</b>                                                                                                                                                                                                                                                                                                                                                                                                                         |                              |                                       |                                       |                                       |                                 |
| Median (Q1-Q3)                                                                                                                                                                                                                                                                                                                                                                                                                       | 8 (4-16)                     | 3 (2-6)                               | 5 (3-10)                              | 6 (3-12)                              | <0.001                          |
| <b>0-4</b>                                                                                                                                                                                                                                                                                                                                                                                                                           |                              |                                       |                                       |                                       |                                 |
| Median (Q1-Q3)                                                                                                                                                                                                                                                                                                                                                                                                                       | 2 (2-3)                      | 2 (1-4)                               | 3 (2-5)                               | 3 (2-5)                               | 0.027                           |
| <b>5-11</b>                                                                                                                                                                                                                                                                                                                                                                                                                          |                              |                                       |                                       |                                       |                                 |
| Median (Q1-Q3)                                                                                                                                                                                                                                                                                                                                                                                                                       | 2 (2-2)                      | 2 (2-5)                               | 3 (2-7)                               | 2 (1-5)                               | 0.043                           |
| <b>12-17</b>                                                                                                                                                                                                                                                                                                                                                                                                                         |                              |                                       |                                       |                                       |                                 |
| Median (Q1-Q3)                                                                                                                                                                                                                                                                                                                                                                                                                       | 9.5 (2-20)                   | 2.5 (1.5-5)                           | 2 (1-4)                               | 3 (2-9)                               | 0.270                           |
| <b>18-29</b>                                                                                                                                                                                                                                                                                                                                                                                                                         |                              |                                       |                                       |                                       |                                 |
| Median (Q1-Q3)                                                                                                                                                                                                                                                                                                                                                                                                                       | 4 (2-8)                      | 2 (2-4)                               | 3 (2-5)                               | 2 (1-3)                               | <0.001                          |
| <b>30-39</b>                                                                                                                                                                                                                                                                                                                                                                                                                         |                              |                                       |                                       |                                       |                                 |
| Median (Q1-Q3)                                                                                                                                                                                                                                                                                                                                                                                                                       | 4 (2-7)                      | 3 (2-5)                               | 3 (2-8)                               | 3 (2-5)                               | <0.001                          |
| <b>40-49</b>                                                                                                                                                                                                                                                                                                                                                                                                                         |                              |                                       |                                       |                                       |                                 |
| Median (Q1-Q3)                                                                                                                                                                                                                                                                                                                                                                                                                       | 6 (3-11)                     | 4 (2-7)                               | 4 (3-9)                               | 4 (3-7)                               | <0.001                          |
| <b>50-59</b>                                                                                                                                                                                                                                                                                                                                                                                                                         |                              |                                       |                                       |                                       |                                 |
| Median (Q1-Q3)                                                                                                                                                                                                                                                                                                                                                                                                                       | 7 (4-12)                     | 5 (2-8)                               | 7 (3-13)                              | 4 (2-8)                               | <0.001                          |
| <b>60-69</b>                                                                                                                                                                                                                                                                                                                                                                                                                         |                              |                                       |                                       |                                       |                                 |
| Median (Q1-Q3)                                                                                                                                                                                                                                                                                                                                                                                                                       | 9 (5-17)                     | 5 (2-9)                               | 6 (3-10)                              | 5 (3-11)                              | <0.001                          |
| <b>70+</b>                                                                                                                                                                                                                                                                                                                                                                                                                           |                              |                                       |                                       |                                       |                                 |
| Median (Q1-Q3)                                                                                                                                                                                                                                                                                                                                                                                                                       | 10 (5-19)                    | 5 (3-10.5)                            | 7 (4-12)                              | 7 (4-14)                              | <0.001                          |
| Abbreviation: COVID-19= Coronavirus Disease 2019, n=number, Q=Quartile                                                                                                                                                                                                                                                                                                                                                               |                              |                                       |                                       |                                       |                                 |
| Note: For the annual COVID-19 cohort we included all patients hospitalized for COVID-19 up to 14 days after or 2 days prior to specimen collection date from March 2020 to February 2021. For influenza, we selected three 12-month periods from September to August with distinct severity: 2009/10=H1N1 pandemic, 2015/16=mild influenza with higher severity in children, 2016/17=severe influenza with higher severity in adults |                              |                                       |                                       |                                       |                                 |
| #Kruskal–Wallis one-way analysis of variance                                                                                                                                                                                                                                                                                                                                                                                         |                              |                                       |                                       |                                       |                                 |

*Table S5: Validation of ICD-10 algorithms against lab-confirmed hospitalization to identify hospitalized individuals with seasonal influenza infection residing in Vancouver Coastal Health region of British Columbia, Canada*

| <b>Characteristics</b>   | <b>TP</b> | <b>FP</b> | <b>FN</b> | <b>TN</b> | <b>Sensitivity<br/>(95% CI)</b> | <b>Specificity<br/>(95% CI)</b> | <b>PPV<br/>(95%CI)</b> | <b>NPV<br/>(95%CI)</b> |
|--------------------------|-----------|-----------|-----------|-----------|---------------------------------|---------------------------------|------------------------|------------------------|
| <b>Influenza 2009/10</b> | 142       | 114       | 20        | 406       | 88 (83, 93)                     | 78 (75, 82)                     | 55 (49, 62)            | 95 (93, 97)            |
| <b>Influenza 2015/16</b> | 154       | 21        | 62        | 652       | 71 (65, 77)                     | 97 (95, 98)                     | 88 (82, 92)            | 91 (89, 93)            |
| <b>Influenza 2016/17</b> | 361       | 64        | 121       | 1094      | 75 (71, 79)                     | 94 (93, 96)                     | 85 (82, 88)            | 90 (88, 92)            |

Abbreviation: CI=Confidence Interval, FN=False Negative, FP=False Positive, ICD-10=International Classification of Disease 10<sup>th</sup> edition, NPV=Negative Predictive Value, PPV=Positive Predictive Value, TN=True Negative, TP=True Positive  
 Note: We selected the 8-week peak in each influenza season.

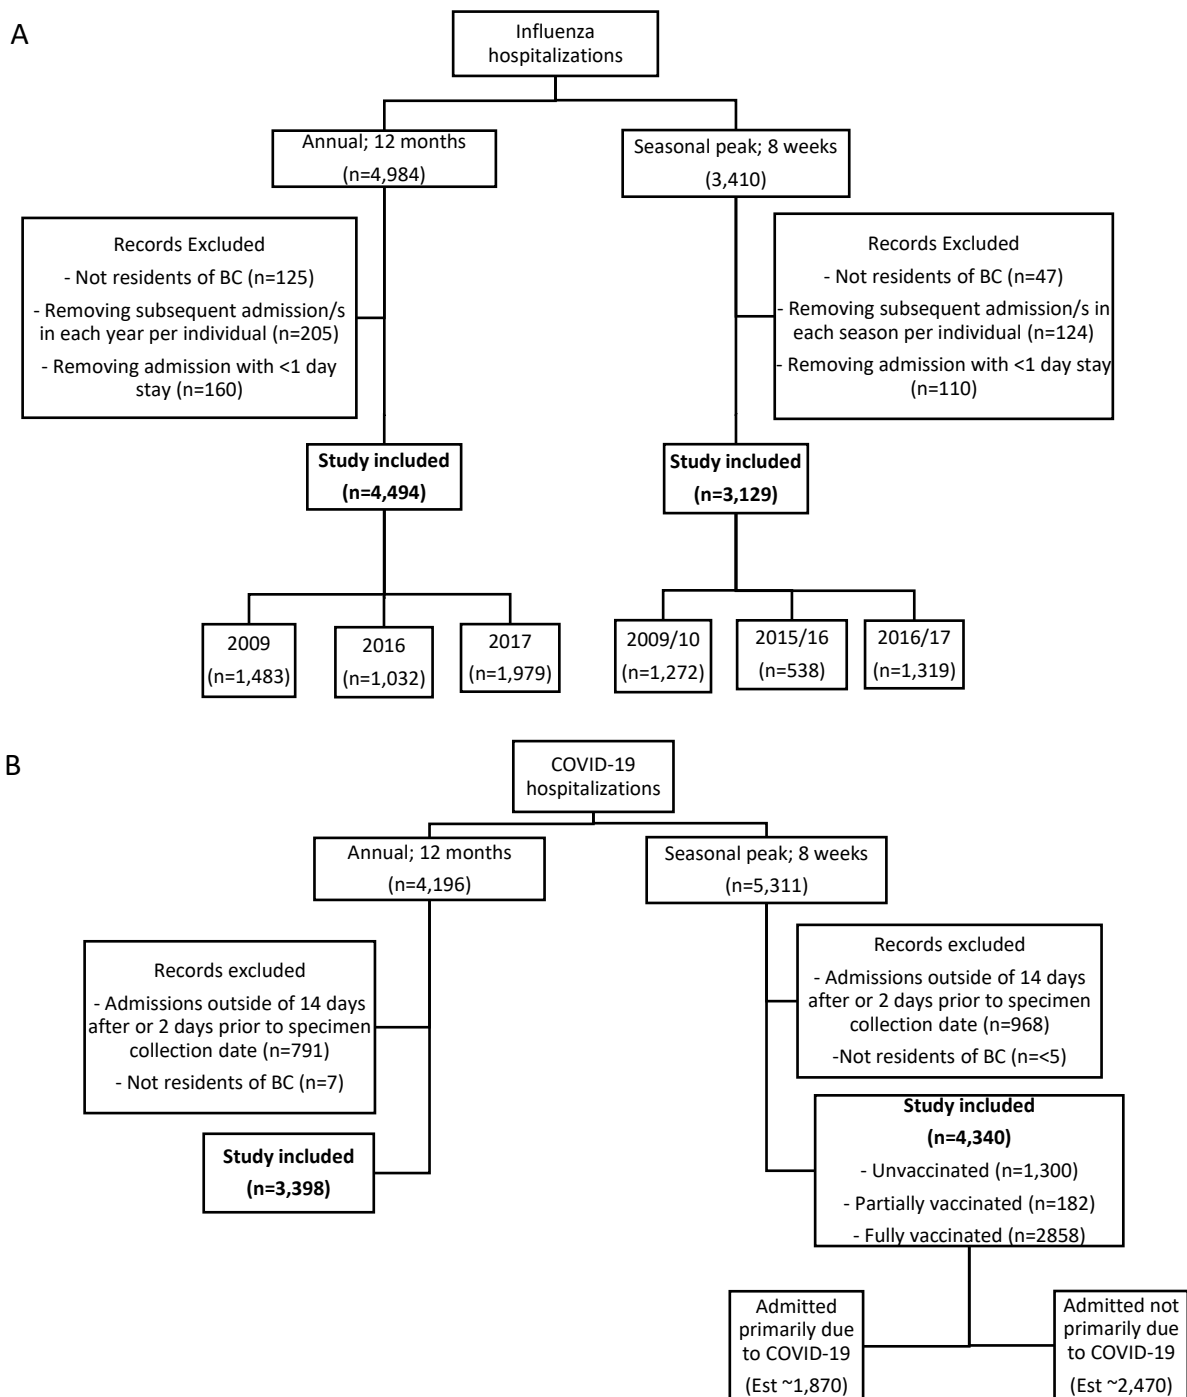

**Figure S1: Annual and seasonal peak study cohorts for influenza and COVID-19 hospitalization.**

**Note:** A) In annual influenza we selected three years from September to August with distinct severity: 2009/10=H1N1 pandemic, 2015/16=mild influenza with higher severity in children, 2016/17=severe influenza with higher severity in adults. For influenza seasonal analysis we selected the 8-week peak from each season. B) For the annual COVID-19 cohort we included all patients hospitalized for COVID-19 up to 14 days after or 2 days prior to specimen collection date from March 2020 to February 2021. For the peak COVID-19 cohort we included all patients hospitalized for COVID-19 up to 14 days after or 2 days prior to specimen collection date during the first 8 weeks of 2022 when Omicron was dominant and >90% of adults in British Columbia were vaccinated with at least 2 doses. We applied the following estimates for proportion of hospitalizations likely primarily due to COVID-19:

unvaccinated <50 years old (50%), unvaccinated ≥50 years old (70%), vaccinated <50 years old (20%) and vaccinated ≥50 years old (40%). Numbers were rounded to zero decimal point.

Figure S2: Hospitalization rates in patients testing positive for COVID-19 during the peak of Omicron variant (week 1-8 of 2022) compared with hospitalized patients for influenza in the peak of 2009/10 (H1N1 pandemic), 2015/16 (severe for children), and 2016/17 (severe for adults) season, by age group and COVID-19 vaccine status, British Columbia, Canada

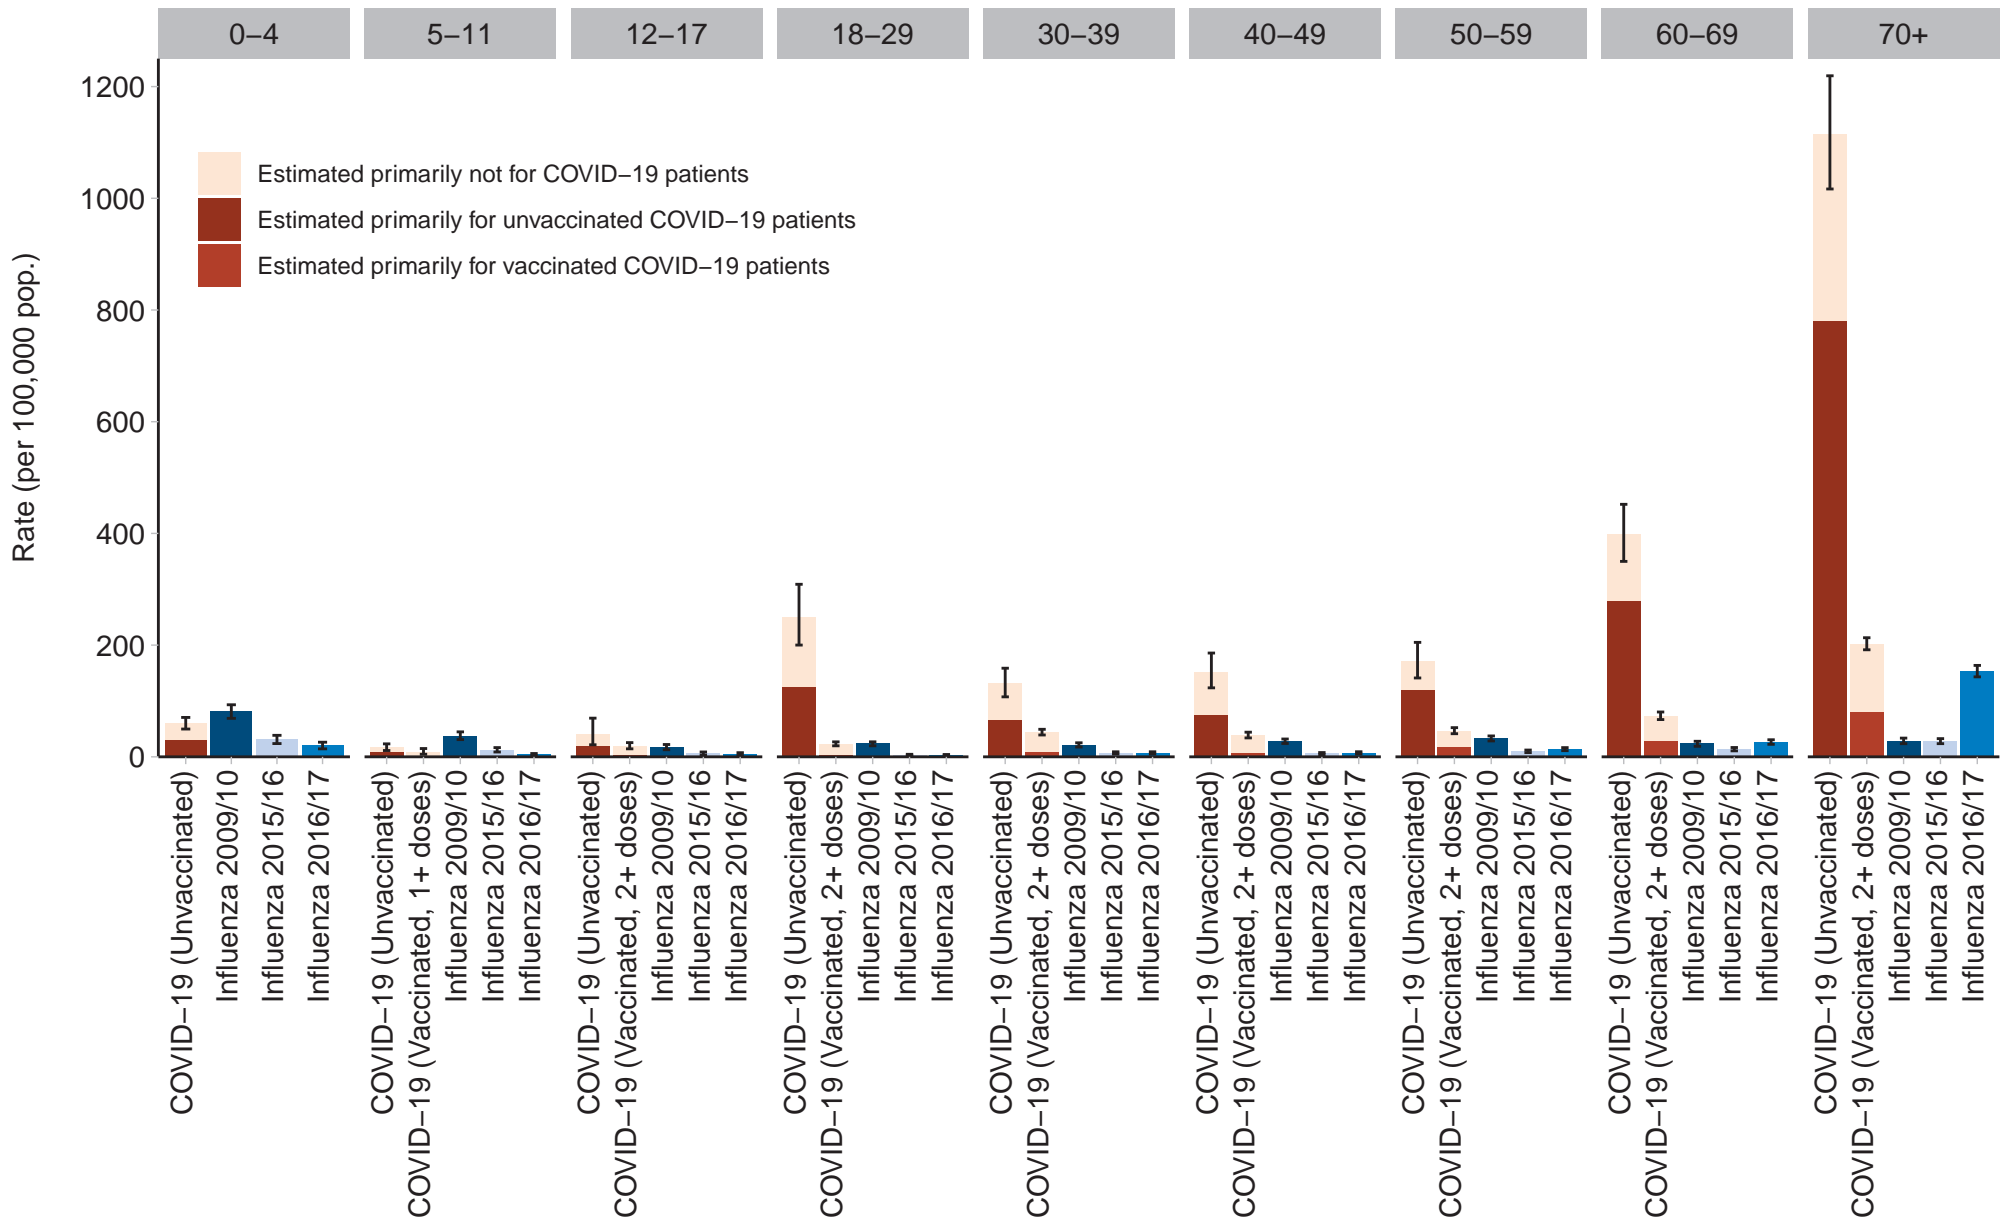

Note: For the peak COVID-19 cohort we included all patients hospitalized for COVID-19 up to 14 days after or 2 days prior to specimen collection date during the first 8 weeks of 2022 when Omicron was dominant and >90% of adults in British Columbia were vaccinated with at least 2 doses. We selected the 8-week peak of three seasons with distinct severity for influenza: 2009/10=H1N1 pandemic, 2015/16=mild with higher severity in children, 2016/17=severe with higher severity in adults. We applied the following estimates for proportion of hospitalizations likely primarily due to COVID-19: unvaccinated <50 years old (50%), unvaccinated >=50 years old (70%), vaccinated <50 years old (20%) and vaccinated >=50 years old (40%).



Figure S3: Seasonal lab-confirmed versus ICD code-identified (FLU2 algorithm) influenza hospitalization rates during the peak (8 weeks) of 2009/10 (H1N1 pandemic), 2015/16 (severe for children), and 2016/17 (severe for adults), by age group among the residents of Vancouver Coastal Health, British Columbia, Canada

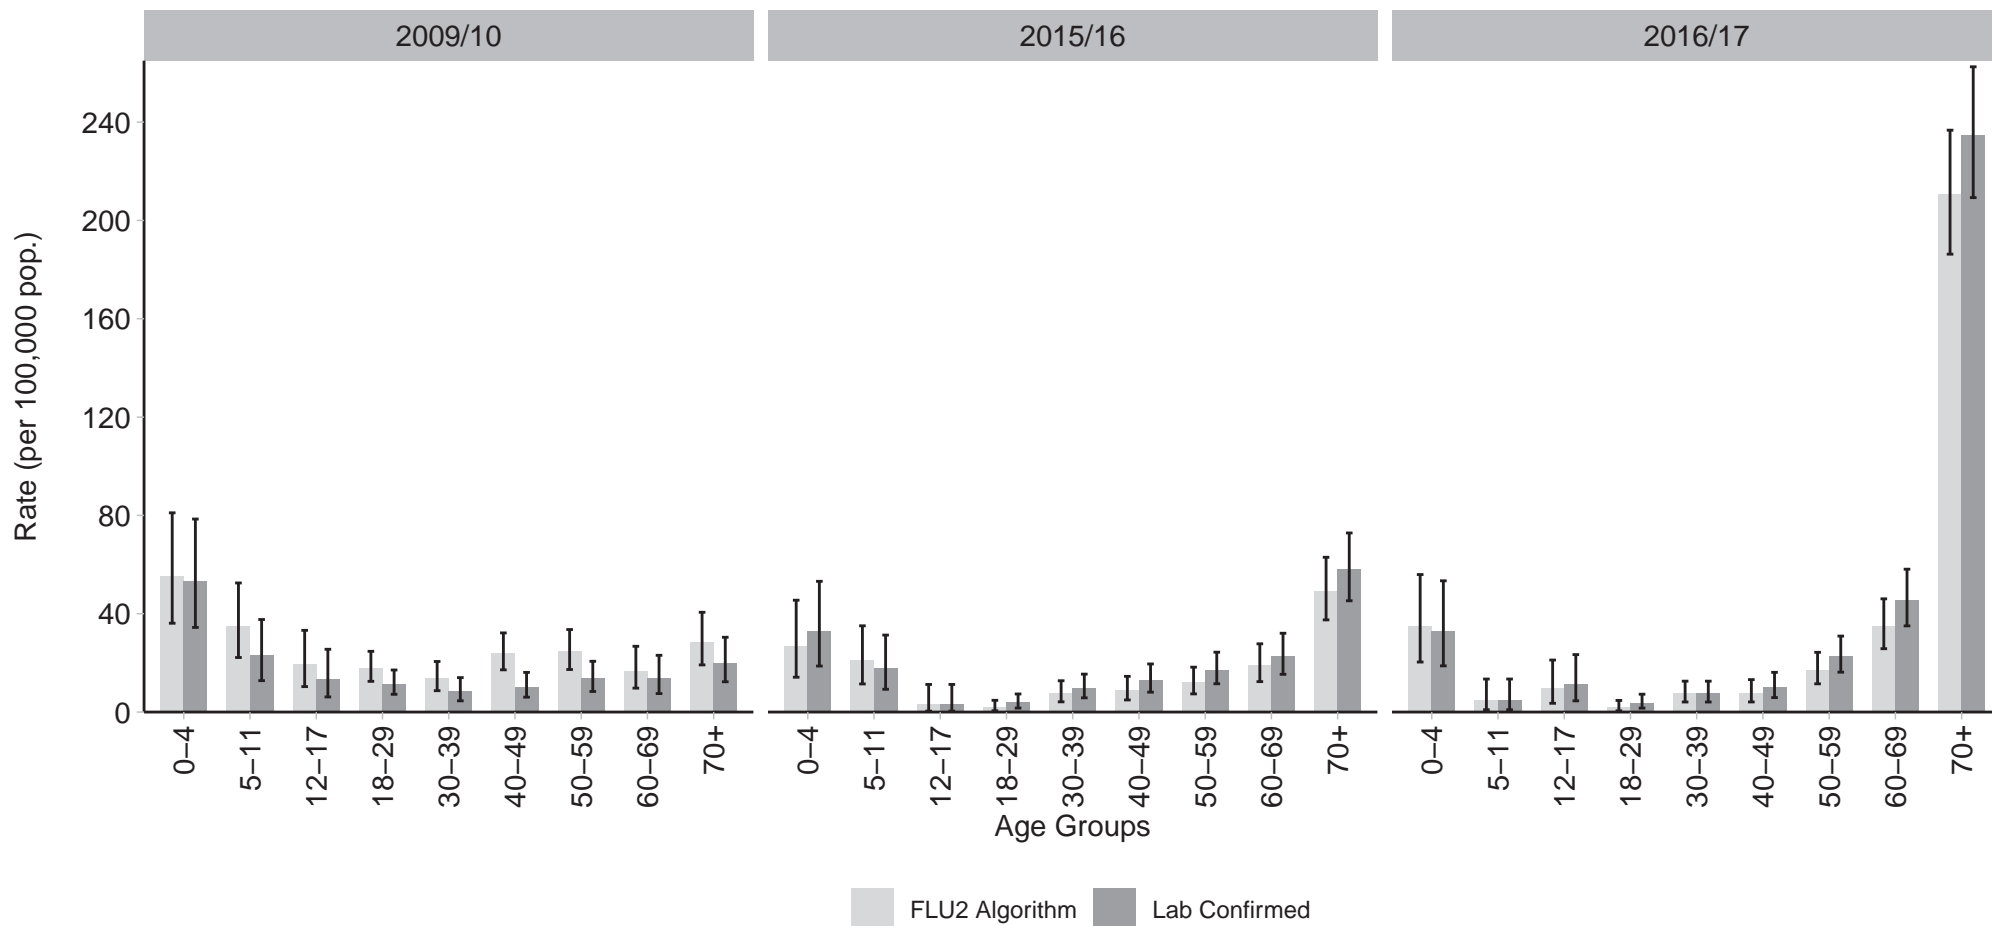

Note: We selected the 8-week peak of three seasons with distinct severity for influenza: 2009/10=H1N1 pandemic, 2015/16=mild with higher severity in children, 2016/17=severe with higher severity in adults.
